# Supplementary material for: Coordination capabilities of pyrazolyl containing ligands towards the fac-[Re(CO)3]+ moiety
Source: Royal Society of Chemistry journal article supplement (doi:10.1039/b207164a), 2002-01-01

### Simulated Mass Spectra

Isotope distribution pattern prediction for the monomer  $C_{17}H_{22}N_4O_3SReBr$ .

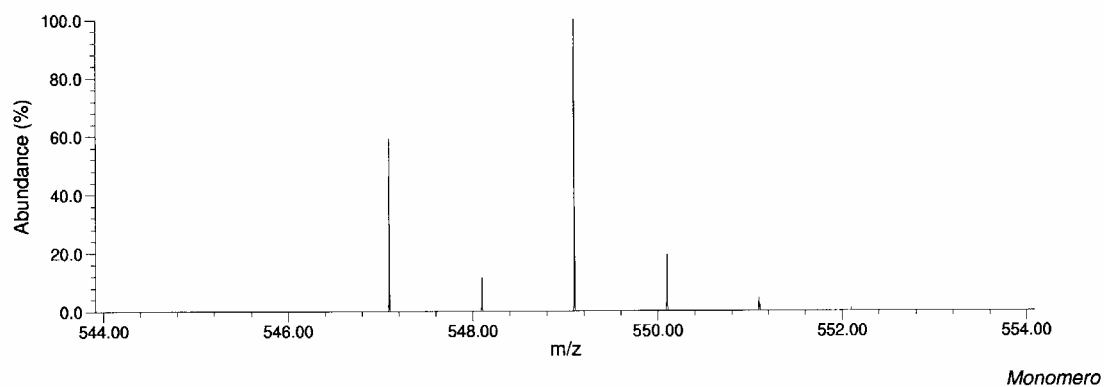

Isotope distribution pattern prediction for the dimer  $C_{34}H_{44}N_8O_6SRe_2Br_2$ .

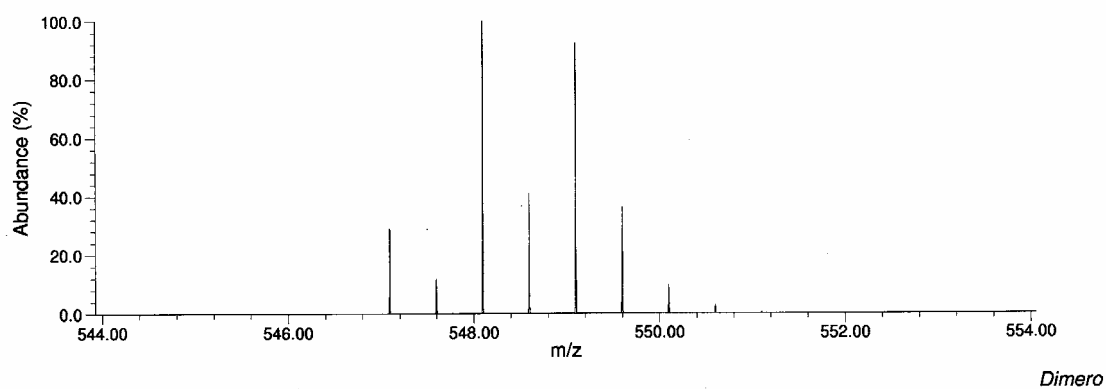

Supplement: b207164a-2.pdf [file b207164a-2.pdf]
