# Supplementary figures and images for: Coordination capabilities of pyrazolyl containing ligands towards the fac-[Re(CO)3]+ moiety
Source: Royal Society of Chemistry journal article supplement (doi:10.1039/b207164a), 2002-01-01

Experimental mass spectrum of compound **5** (selected area):

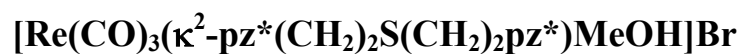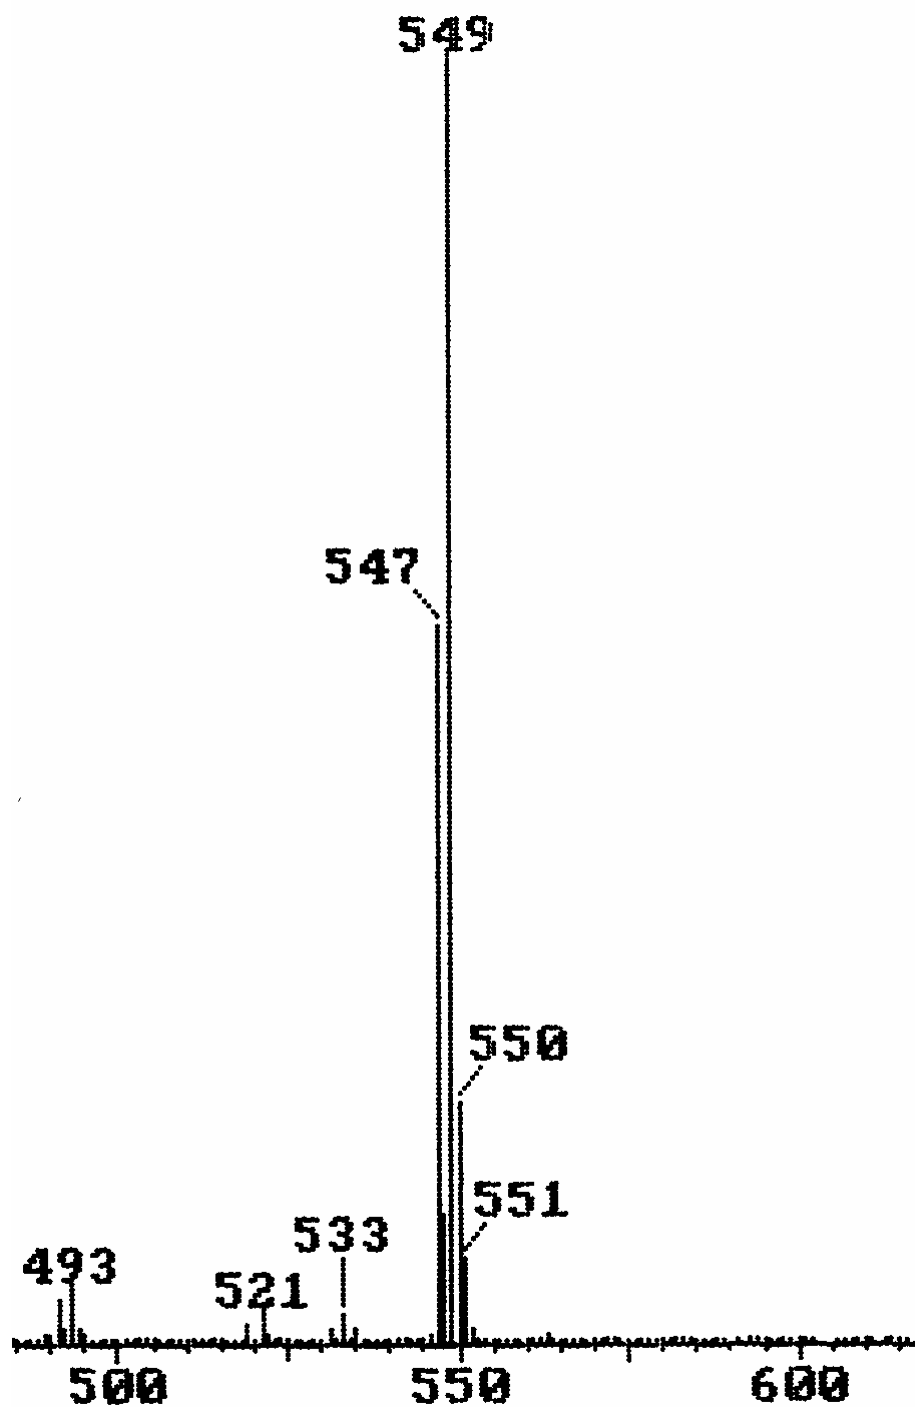

Supplement: b207164a-1.pdf [file b207164a-1.pdf]
